# Supplementary material
Source: Springer Nature journal article supplement (https://www.springermedizin.de/resource/supplementary/12968_2013_3337_MOESM3_ESM.pdf/9583652)

1. Learning

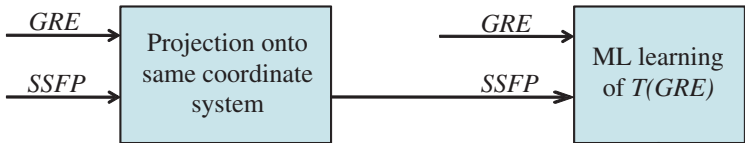

2. Application

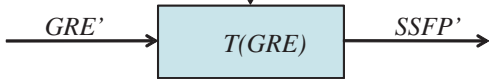

Supplement: MOESM3 [file 9583652]
